# Supplementary material
Source: publisher figshare collection journal article supplement (https://rs.figshare.com/ndownloader/files/17631494)

**Supplemental Material**


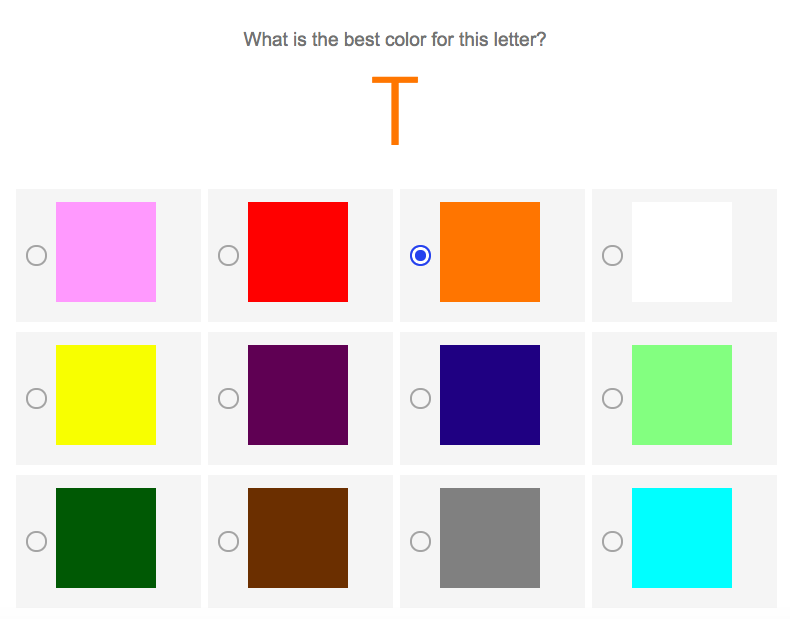


Figure S1. An example trial from Experiment 1.

Supplement: Supplementary file 1 [file 17631494]
